# Supplementary figures and images for: SCUBE2 Suppresses Breast Tumor Cell Proliferation and Confers a Favorable Prognosis in Invasive Breast Cancer
Source: Oxford University Press journal article supplement (doi:10.1158/0008-5472.can-08-3615), 2009-04-15

# Supplementary FIG. S1

**A**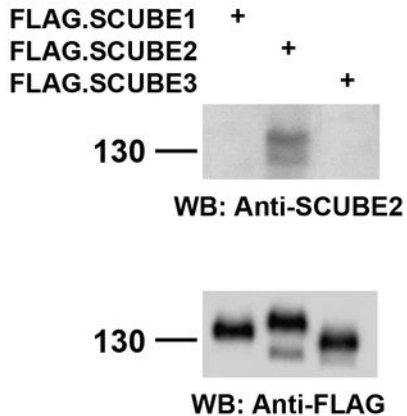**B**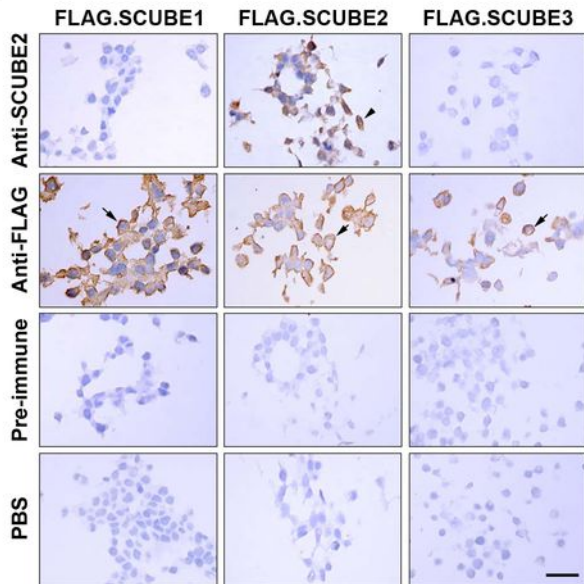

Supplement: 00085472can083615-sup-sfig_1.pdf [file 00085472can083615-sup-sfig_1.pdf]

## Supplementary FIG. S2

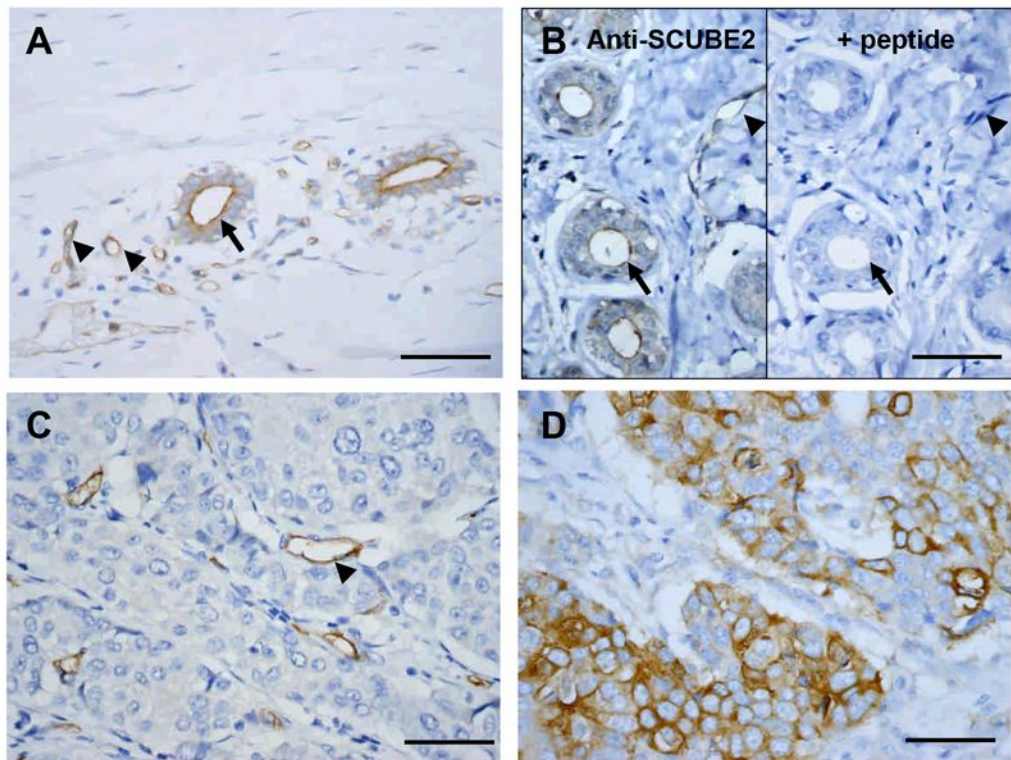

Supplement: 00085472can083615-sup-sfig_2.pdf [file 00085472can083615-sup-sfig_2.pdf]

# Supplementary FIG. S3

**A**

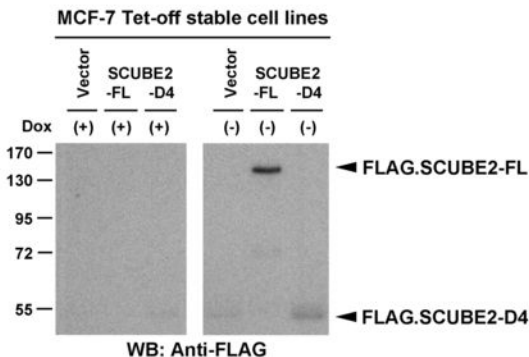

**B**

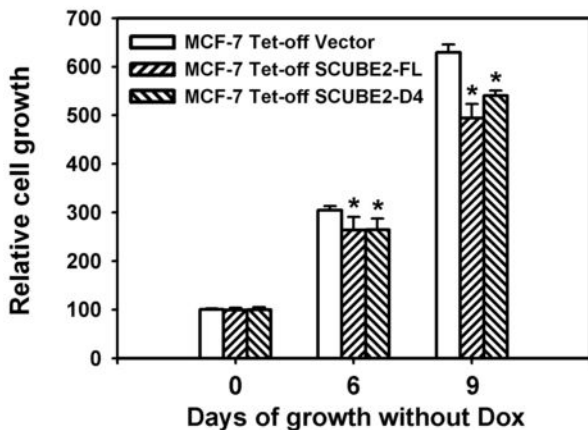

Supplement: 00085472can083615-sup-sfig_3.pdf [file 00085472can083615-sup-sfig_3.pdf]

## Supplementary FIG. S4

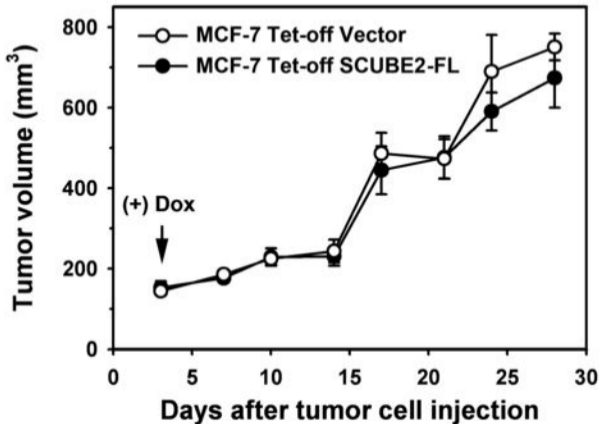

Supplement: 00085472can083615-sup-sfig_4.pdf [file 00085472can083615-sup-sfig_4.pdf]

# Supplementary FIG. S5

## A

|             |   |   |   |
|-------------|---|---|---|
| FLAG.SCUBE2 | + | + | + |
| MMP2        | - | + | + |
| GM6001      | - | - | + |

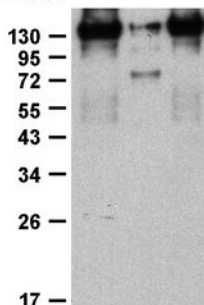

WB: Anti-FLAG

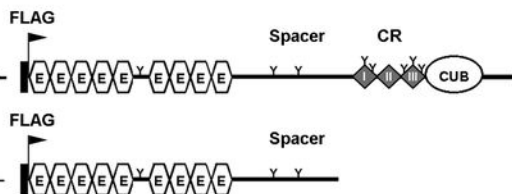

## B

|             |   |   |
|-------------|---|---|
| FLAG.SCUBE2 | + | + |
| MMP2        | - | + |

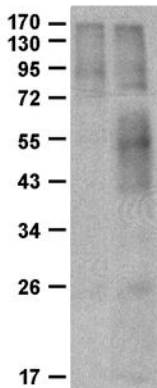

WB: Anti-CR

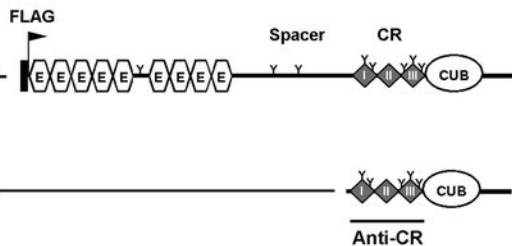

Supplement: 00085472can083615-sup-sfig_5.pdf [file 00085472can083615-sup-sfig_5.pdf]
